# Supplementary material for: Adsorption isotherms of enantiomers on a chiral open-framework copper borophosphate LiCu2[BP2O8(OH)2]
Source: Royal Society of Chemistry journal article supplement (doi:10.1039/d4nj00314d), 2024-01-01
Supplement: d4nj00314d1.pdf [file d4nj00314d1.pdf]

## Adsorption isotherms of enantiomers on a chiral open-framework copper borophosphate $\text{LiCu}_2[\text{BP}_2\text{O}_8(\text{OH})_2]$

Zhanna D. Uteeva<sup>a</sup>, Raul U. Sadykov<sup>a</sup>, Diana O. Bagdanova<sup>b</sup>, Marat R. Agliullin<sup>b</sup> and Vladimir Yu. Guskov<sup>a</sup>

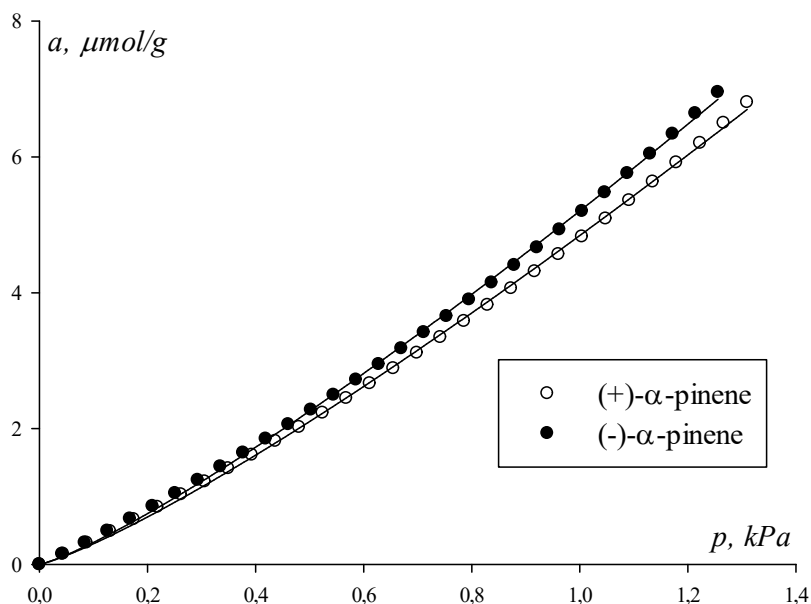

Figure 1S. Isotherm of  $\alpha$ -pinene enantiomers vapours adsorption at 70°C

Table 1S. P-values for pairs of points of  $\alpha$ -pinenes vapours adsorption at 70 °C ( $\alpha = 0.05$ )

| p, kPa      | p      |
|-------------|--------|-------------|--------|-------------|--------|-------------|--------|-------------|--------|
| <b>0.04</b> | 0.9065 | <b>0.29</b> | 0.1591 | <b>0.56</b> | 0.1301 | <b>0.83</b> | 0.0014 | <b>1.09</b> | 0.0025 |
| <b>0.08</b> | 0.5661 | <b>0.34</b> | 0.1428 | <b>0.59</b> | 0.1228 | <b>0.88</b> | 0.0015 | <b>1.13</b> | 0.0027 |
| <b>0.12</b> | 0.3507 | <b>0.38</b> | 0.1254 | <b>0.66</b> | 0.0008 | <b>0.92</b> | 0.0017 | <b>1.18</b> | 0.0029 |
| <b>0.17</b> | 0.2189 | <b>0.43</b> | 0.1391 | <b>0.71</b> | 0.0010 | <b>0.96</b> | 0.0020 | <b>1.21</b> | 0.0031 |
| <b>0.21</b> | 0.1814 | <b>0.47</b> | 0.1366 | <b>0.75</b> | 0.0011 | <b>1.00</b> | 0.0021 | <b>1.26</b> | 0.0033 |
| <b>0.26</b> | 0.1698 | <b>0.51</b> | 0.1200 | <b>0.79</b> | 0.0012 | <b>1.05</b> | 0.0023 |             |        |

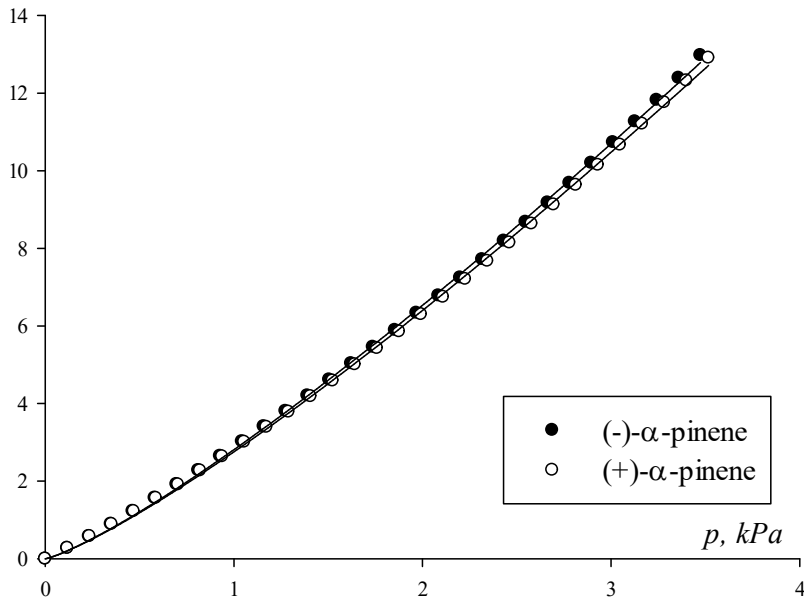

Figure 2S. Isotherm of  $\alpha$ -pinene enantiomers vapours adsorption at 90°C

Table 2S. P-values for pairs of points of  $\alpha$ -pinenes vapours adsorption at 90 °C ( $\alpha = 0.05$ )

| <b>p, kPa</b> | <b>p</b> |
|---------------|----------|---------------|----------|---------------|----------|---------------|----------|---------------|----------|
| <b>0.12</b>   | 0.3171   | <b>0.82</b>   | 0.0932   | <b>1.51</b>   | 0.0324   | <b>2.21</b>   | 0.0248   | <b>2.91</b>   | 0.0290   |
| <b>0.23</b>   | 0.8442   | <b>0.93</b>   | 0.0630   | <b>1.63</b>   | 0.0158   | <b>2.23</b>   | 0.0302   | <b>3.03</b>   | 0.0195   |
| <b>0.35</b>   | 0.1565   | <b>1.05</b>   | 0.1309   | <b>1.75</b>   | 0.0235   | <b>2.45</b>   | 0.0242   | <b>3.15</b>   | 0.0253   |
| <b>0.47</b>   | 0.3873   | <b>1.17</b>   | 0.0516   | <b>1.86</b>   | 0.0288   | <b>2.56</b>   | 0.0232   | <b>3.26</b>   | 0.0176   |
| <b>0.59</b>   | 0.1526   | <b>1.28</b>   | 0.0699   | <b>1.98</b>   | 0.0424   | <b>2.68</b>   | 0.0209   | <b>3.38</b>   | 0.0184   |
| <b>0.70</b>   | 0.1011   | <b>1.40</b>   | 0.0220   | <b>2.10</b>   | 0.0218   | <b>2.80</b>   | 0.0195   | <b>3.50</b>   | 0.0201   |

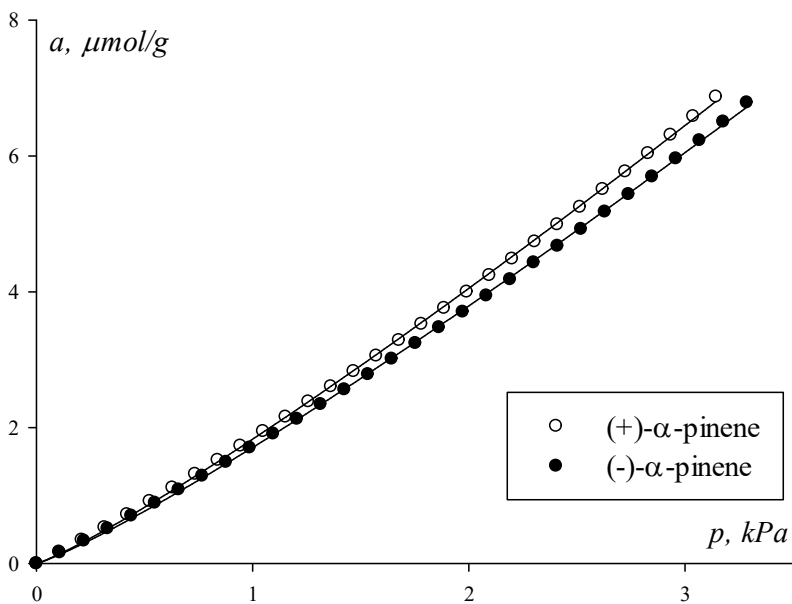

Figure 3S. Isotherm of  $\alpha$ -pinene enantiomers vapours adsorption at 100°C

Table 3S. P-values for pairs of points of  $\alpha$ -pinenes vapours adsorption at 100 °C ( $\alpha = 0.05$ )

| <b>p, kPa</b> | <b>p</b> | <b>p, kPa</b> | <b>p</b> | <b>p, kPa</b> | <b>p</b> |
|---------------|----------|---------------|----------|---------------|----------|
| <b>1.75</b>   | 0.1951   | <b>2.39</b>   | 0.1651   | <b>3.04</b>   | 0.1543   |
| <b>1.86</b>   | 0.1890   | <b>2.50</b>   | 0.1616   | <b>3.14</b>   | 0.1507   |
| <b>1.96</b>   | 0.1860   | <b>2.61</b>   | 0.1582   |               |          |
| <b>2.07</b>   | 0.1829   | <b>2.71</b>   | 0.1574   |               |          |
| <b>2.18</b>   | 0.1894   | <b>2.82</b>   | 0.1544   |               |          |
| <b>2.29</b>   | 0.1674   | <b>2.93</b>   | 0.1543   |               |          |

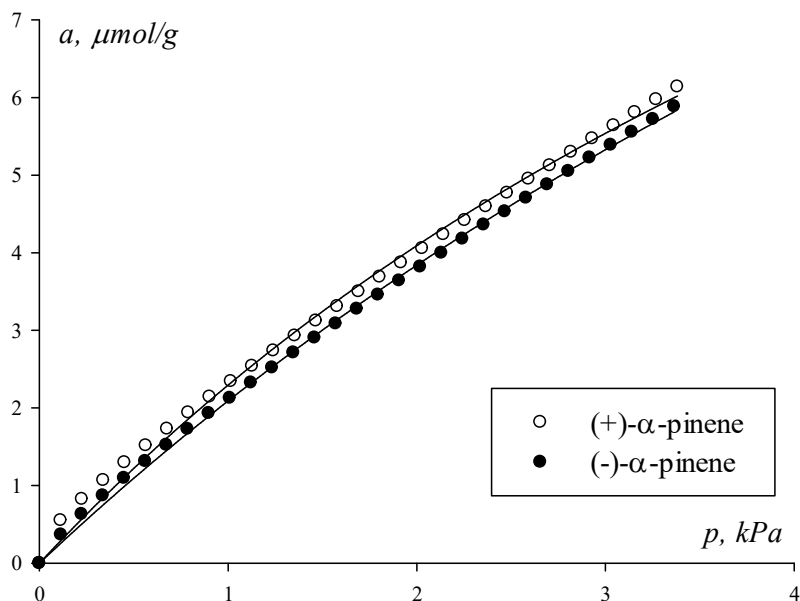

Figure 4S. Isotherm of  $\alpha$ -pinene enantiomers vapours adsorption at 110°C

Table 4S. P-values for pairs of points of  $\alpha$ -pinenes vapours adsorption at 110 °C ( $\alpha = 0.05$ )

| <b>p, kPa</b> | <b>p</b> |
|---------------|----------|---------------|----------|---------------|----------|---------------|----------|---------------|----------|
| <b>0.11</b>   | 0.1798   | <b>0.78</b>   | 0.1675   | <b>1.46</b>   | 0.1710   | <b>2.16</b>   | 0.3177   | <b>2.83</b>   | 0.3147   |
| <b>0.23</b>   | 0.1784   | <b>0.90</b>   | 0.1713   | <b>1.57</b>   | 0.1627   | <b>2.27</b>   | 0.3261   | <b>2.94</b>   | 0.3051   |
| <b>0.34</b>   | 0.1769   | <b>1.01</b>   | 0.1702   | <b>1.70</b>   | 0.3522   | <b>2.38</b>   | 0.3330   | <b>3.05</b>   | 0.3015   |
| <b>0.45</b>   | 0.1770   | <b>1.12</b>   | 0.1717   | <b>1.81</b>   | 0.3318   | <b>2.50</b>   | 0.3232   | <b>3.17</b>   | 0.2959   |
| <b>0.56</b>   | 0.1715   | <b>1.24</b>   | 0.1619   | <b>1.93</b>   | 0.3321   | <b>2.60</b>   | 0.3135   | <b>3.30</b>   | 0.2952   |
| <b>0.68</b>   | 0.1715   | <b>1.35</b>   | 0.1673   | <b>2.04</b>   | 0.3173   | <b>2.72</b>   | 0.3094   |               |          |

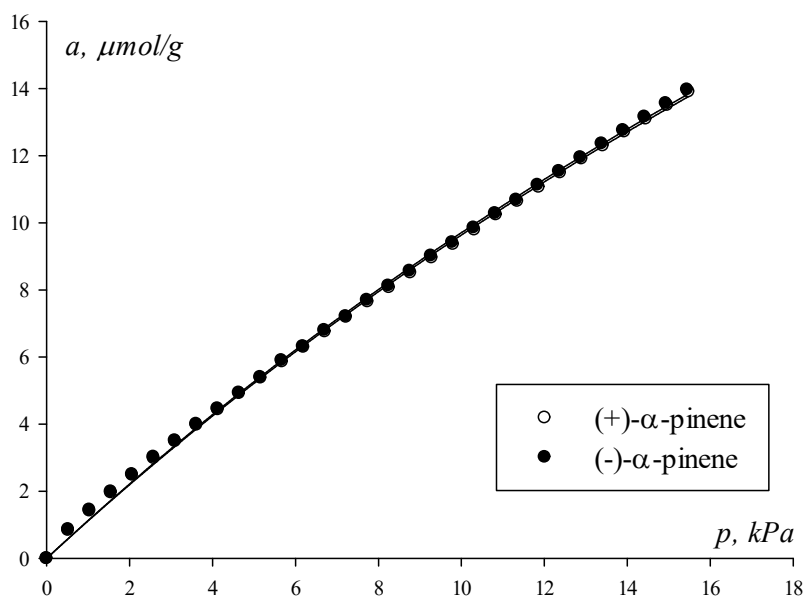

Figure 5S. Isotherm of  $\alpha$ -pinene enantiomers vapours adsorption at 140°C

Table 5S. P-values for pairs of points of  $\alpha$ -pinenes vapours adsorption at 140 °C ( $\alpha = 0.05$ )

| <b>p, kPa</b> | <b>p</b> |
|---------------|----------|---------------|----------|---------------|----------|---------------|----------|---------------|----------|
| <b>0.52</b>   | 0.4130   | <b>3.60</b>   | 0.4388   | <b>6.70</b>   | 0.4142   | <b>9.80</b>   | 0.4314   | <b>12.88</b>  | 0.4841   |
| <b>1.03</b>   | 0.3551   | <b>4.12</b>   | 0.4027   | <b>7.22</b>   | 0.5420   | <b>10.31</b>  | 0.2452   | <b>13.40</b>  | 0.2982   |
| <b>1.55</b>   | 0.4086   | <b>4.64</b>   | 0.6221   | <b>7.73</b>   | 0.2567   | <b>10.82</b>  | 0.5168   | <b>13.91</b>  | 0.4727   |
| <b>2.06</b>   | 0.4072   | <b>5.15</b>   | 0.6053   | <b>8.25</b>   | 0.2504   | <b>11.34</b>  | 0.4788   | <b>14.43</b>  | 0.4293   |
| <b>2.58</b>   | 0.4026   | <b>5.70</b>   | 0.3142   | <b>8.76</b>   | 0.2460   | <b>11.85</b>  | 0.2622   | <b>14.95</b>  | 0.3624   |
| <b>3.09</b>   | 0.5129   | <b>6.18</b>   | 0.5719   | <b>9.28</b>   | 0.2437   | <b>12.37</b>  | 0.4903   | <b>15.46</b>  | 0.4070   |

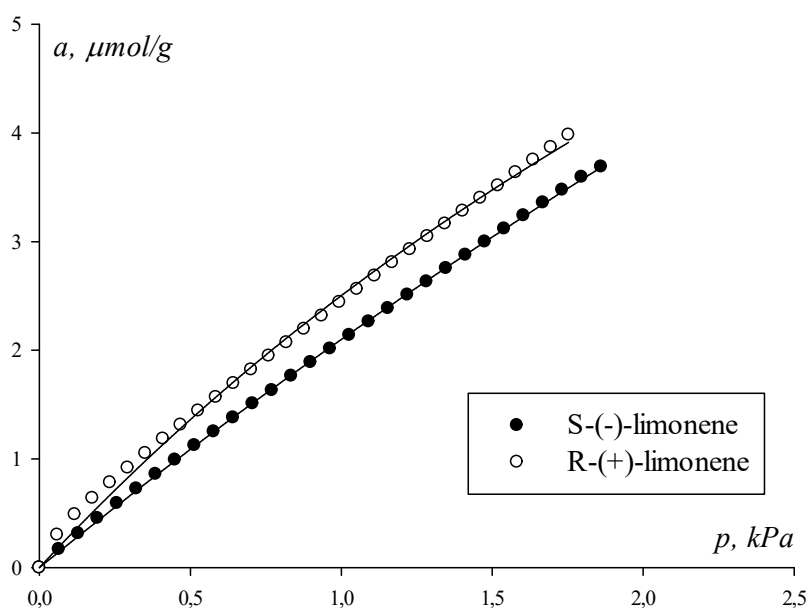

Figure 6S. Isotherm of limonene enantiomers vapours adsorption at 120°C

Table 6S. P-values for pairs of points of limonenes vapours adsorption at 120 °C ( $\alpha = 0.05$ )

| <b>p, kPa</b> | <b>p</b> |
|---------------|----------|---------------|----------|---------------|----------|---------------|----------|
| <b>0.06</b>   | 0.0165   | <b>0.52</b>   | 0.0021   | <b>1.10</b>   | 0.0107   | <b>1.68</b>   | 0.0058   |
| <b>0.24</b>   | 0.0268   | <b>0.58</b>   | 0.0026   | <b>1.22</b>   | 0.0110   |               |          |
| <b>0.30</b>   | 0.0287   | <b>0.79</b>   | 0.0007   | <b>1.34</b>   | 0.0115   |               |          |
| <b>0.39</b>   | 0.0015   | <b>0.85</b>   | 0.0010   | <b>1.49</b>   | 0.0054   |               |          |
| <b>0.45</b>   | 0.0017   | <b>0.97</b>   | 0.0010   | <b>1.62</b>   | 0.0056   |               |          |

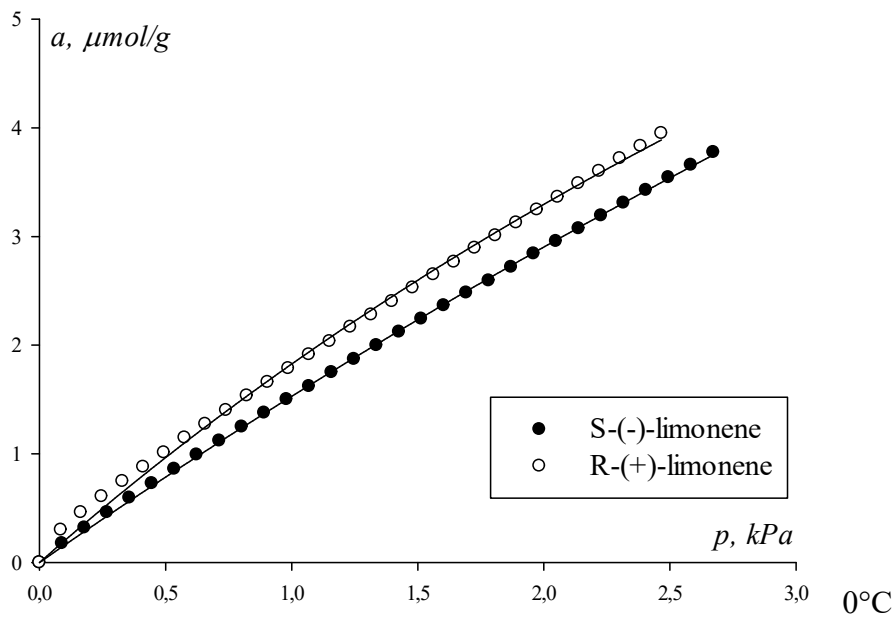

Figure 7S. Isotherm of limonene enantiomers vapours adsorption at 140 °C ( $\alpha = 0.05$ )

Table 7S. P-values for pairs of points of limonenes vapours adsorption at 140 °C ( $\alpha = 0.05$ )

| <b>p, kPa</b> | <b>p</b> |
|---------------|----------|---------------|----------|---------------|----------|---------------|----------|
| <b>0.09</b>   | 0.0038   | <b>0.54</b>   | 0.0002   | <b>1.07</b>   | 0.0182   | <b>1.80</b>   | 0.0057   |
| <b>0.17</b>   | 0.0039   | <b>0.62</b>   | 0.0005   | <b>1.16</b>   | 0.0229   | <b>1.97</b>   | 0.0069   |
| <b>0.26</b>   | 0.0070   | <b>0.71</b>   | 0.0005   | <b>1.24</b>   | 0.0166   | <b>2.14</b>   | 0.0067   |
| <b>0.34</b>   | 0.0077   | <b>0.89</b>   | 0.0010   | <b>1.35</b>   | 0.0026   | <b>2.35</b>   | 0.0333   |
| <b>0.45</b>   | 0.0005   | <b>0.97</b>   | 0.0013   | <b>1.58</b>   | 0.0149   |               |          |

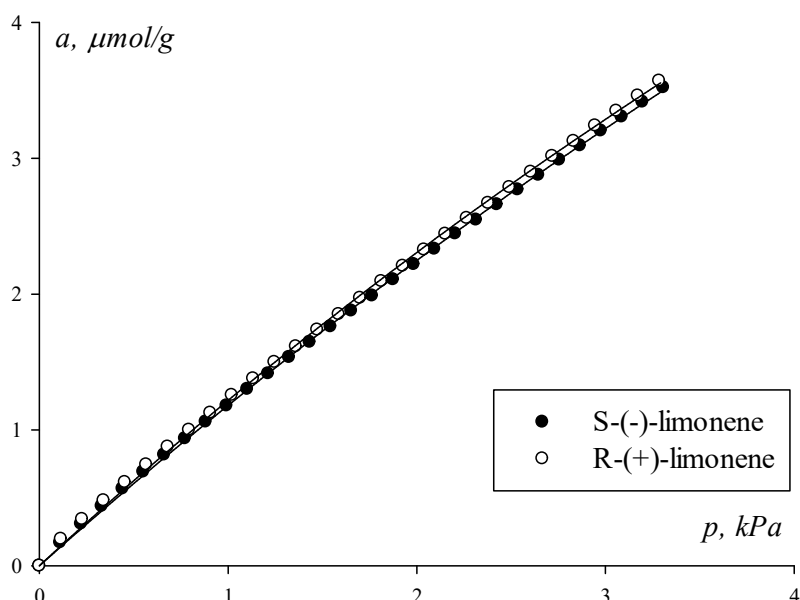

Figure 8S. Isotherm of limonene enantiomers vapours adsorption at 150 °C ( $\alpha = 0.05$ )

Table 8S. P-values for pairs of points of limonenes vapours adsorption at 150 °C ( $\alpha = 0.05$ )

| p, kPa      | p      |
|-------------|--------|-------------|--------|-------------|--------|-------------|--------|
| <b>0.11</b> | 0.0005 | <b>0.67</b> | 0.0001 | <b>1.79</b> | 0.0001 | <b>3.26</b> | 0.0243 |
| <b>0.22</b> | 0.0003 | <b>0.78</b> | 0.0001 | <b>2.35</b> | 0.0000 |             |        |
| <b>0.34</b> | 0.0002 | <b>1.12</b> | 0.0000 | <b>2.53</b> | 0.2251 |             |        |
| <b>0.45</b> | 0.0004 | <b>1.23</b> | 0.0001 | <b>2.83</b> | 0.1005 |             |        |
| <b>0.56</b> | 0.0002 | <b>1.45</b> | 0.0000 | <b>3.17</b> | 0.1045 |             |        |

Table 9S. Values of retention volumes and adsorption values for  $\alpha$ -pinene enantiomers at different temperatures

| T   | $V_g$ , mL/g         |                      | $\alpha$ | a, $\mu\text{mol/g}$ |                      | $\alpha$ |
|-----|----------------------|----------------------|----------|----------------------|----------------------|----------|
|     | $\alpha$ -(-)-pinene | $\alpha$ -(+)-pinene |          | $\alpha$ -(-)-pinene | $\alpha$ -(+)-pinene |          |
| 70  | 15.14                | 15.01                | 1.01     | 6.64                 | 6.20                 | 1.07     |
| 80  | 11.36                | 9.22                 | 1.23     | 12.14                | 9.91                 | 1.23     |
| 90  | 9.05                 | 8.81                 | 1.03     | 10.73                | 10.67                | 1.01     |
| 100 | 5.00                 | 5.22                 | 1.04     | 5.96                 | 6.31                 | 1.06     |
| 110 | 1.81                 | 1.87                 | 1.03     | 5.72                 | 5.97                 | 1.04     |
| 120 | 1.79                 | 1.38                 | 1.29     | 6.23                 | 5.08                 | 1.23     |
| 140 | 0.35                 | 0.34                 | 1.02     | 13.97                | 13.91                | 1.01     |

Table 10S. Values of retention volumes and adsorption values for limonene enantiomers at different temperatures

| T, °C | $V_g$ , mL/g  |               | $\alpha$ | a, $\mu\text{mol/g}$ |               | $\alpha$ |
|-------|---------------|---------------|----------|----------------------|---------------|----------|
|       | S-(-)limonene | R-(+)limonene |          | S-(-)limonene        | R-(+)limonene |          |
| 120   | 2.55          | 2.91          | 1.14     | 3.59                 | 3.98          | 1.11     |
| 130   | 1.84          | 2.11          | 1.15     | 3.63                 | 3.96          | 1.10     |
| 140   | 1.64          | 1.50          | 1.09     | 3.54                 | 3.95          | 1.11     |
| 150   | 0.88          | 0.87          | 1.00     | 3.52                 | 3.68          | 1.05     |
